# Supplementary material for: ALKBH5-mediated m6A modification of IL-11 drives macrophage-to-myofibroblast transition and pathological cardiac fibrosis in mice
Source: PubMed Central journal article supplement (PMC10914760; doi:10.1038/s41467-024-46357-x), 2024-03-05
Supplement: 41467_2024_46357_MOESM1_ESM.pdf [file 41467_2024_46357_MOESM1_ESM.pdf]

## Supplementary information

### **ALKBH5-mediated m6A modification of IL-11 drives macrophage-to-myofibroblast transition and pathological cardiac fibrosis in mice**

Tao Zhuang<sup>1†</sup>, Mei-Hua Chen<sup>1,2†</sup>, Ruo-Xi Wu<sup>1</sup>, Jing Wang<sup>1</sup>, Xi-De Hu<sup>1</sup>, Ting Meng<sup>1</sup>, Ai-Hua Wu<sup>3</sup>, Yan Li<sup>4</sup>, Yong-Feng Yang<sup>1</sup>, Yu Lei<sup>1</sup>, Dong-Hua Hu<sup>1</sup>, Yan-Xiu Li<sup>5</sup>, Li Zhang<sup>6</sup>, Ai-Jun Sun<sup>7</sup>, Wei Lu<sup>2\*</sup>, Guan-Nan Zhang<sup>8\*</sup>, Jun-Li Zuo<sup>9\*</sup>, Cheng-Chao Ruan<sup>1\*</sup>

1 Department of Physiology and Pathophysiology, Shanghai Key Laboratory of Bioactive Small Molecules, State Key Laboratory of Medical Neurobiology, School of Basic Medical Sciences, and Jinshan Hospital, Fudan University, Shanghai, China.

2 Institute of Metabolism and Regenerative Medicine, Shanghai Sixth People's Hospital Affiliated to Shanghai Jiao Tong University School of Medicine, Shanghai, China.

3 Minhang Hospital and School of Pharmacy, Key Laboratory of Smart Drug Delivery Ministry of Education, State Key Laboratory of Molecular Engineering of Polymers, Fudan University.

4 Department of Cardiology, RuiJin Hospital/LuWan Branch, Shanghai Jiao Tong University School of Medicine, Shanghai, China.

5 Department of Critical Care Medicine, The First Affiliated Hospital of Nanjing Medical University, Nanjing, China.

6 Department of Cardiology and Institute for Developmental and Regenerative Cardiovascular Medicine, Xinhua Hospital, Shanghai Jiaotong University School of Medicine, Shanghai, China

7 Department of Cardiology, Zhongshan Hospital, Fudan University, Shanghai Institute of Cardiovascular Diseases, China

8 Department of Immunology, Nanjing Medical University, Nanjing, Jiangsu, China

9 Department of Geriatrics, Ruijin Hospital, Shanghai Jiao Tong University School of Medicine, Shanghai, China.

One-sentence summaries: Macrophage ALKBH5 regulates pathological cardiac fibrosis

†Equally contributing authors: Tao Zhuang, Mei-Hua Chen

\* Corresponding author:

Email: [ruancc@fudan.edu.cn](mailto:ruancc@fudan.edu.cn) (C.-C.R.);

[zuo-junli@163.com](mailto:zuo-junli@163.com) (J.-L.Z.);

[gnczhang@njmu.edu.cn](mailto:gnczhang@njmu.edu.cn) (G.-N.Z.);

[wlu@fudan.edu.cn](mailto:wlu@fudan.edu.cn) (W.L)

## Supplemental Figures

### Supplementary Figure 1

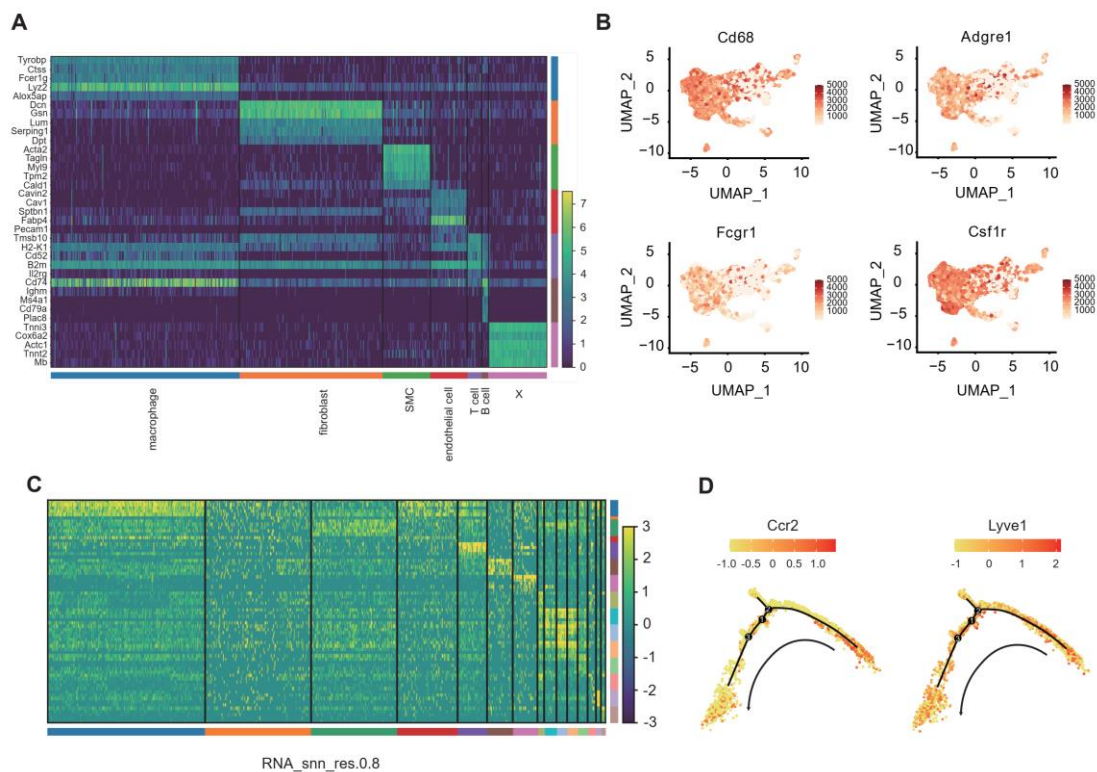

**Supplementary Figure 1. scRNA sequencing reveals macrophage-myofibroblast transition induced by Ang II.** **A**, Heatmap of the top most differentially expressed genes in each cluster from Fig. 1B. **B**, Feature plots depicting single-cell gene expression of macrophage genes visualized on the UMAP dimensionality reduction plots. **C**, Heatmap of the top most differentially expressed genes in each cluster from Fig. 1C. **D**, The Ccr2 and Lyve1 expression in pseudotemporal trajectory (Monocle) analysis from cluster macrophages to myofibroblasts.

## Supplementary Figure 2

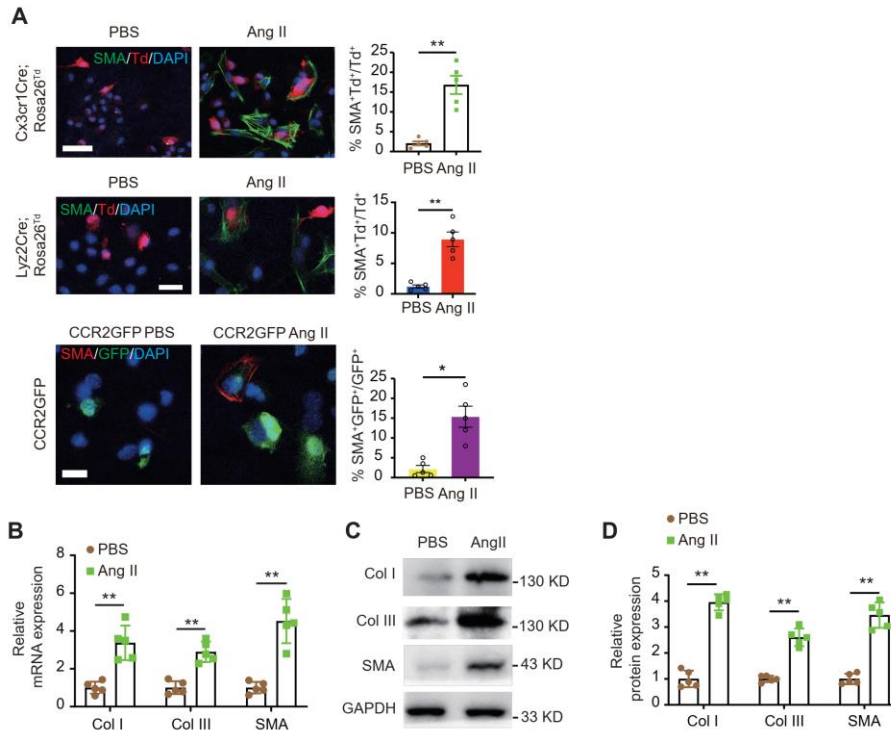

**Supplementary Figure 2. Ang II increases macrophage-myofibroblast transition *in vitro* cultured macrophages.** **A**, Representative immunofluorescent images (left) and quantification (right) of SMA<sup>+</sup> cells in cultured Td<sup>+</sup> macrophages cells from *Cx3cr1Cre; Rosa26<sup>Td</sup>* and *Lyz2Cre; Rosa26<sup>Td</sup>* mice, or GFP<sup>+</sup> macrophages cells from *CCR2GFP* mice, with and without Ang II infusion. n=5. Scale bar, 100  $\mu$ m. **B**, Expression of Col I, Col III and SMA by qPCR in cardiac Td<sup>+</sup> cells from *Cx3cr1Cre; Rosa26<sup>Td</sup>* mice with and without Ang II infusion. n=5. **C**, Representative images of western blot showing Col I, Col III and SMA expression in cardiac Td<sup>+</sup> cells from *Cx3cr1Cre; Rosa26<sup>Td</sup>* mice with and without Ang II infusion. n=5. **D**, Quantification of Col I, Col III and SMA expression in cardiac Td<sup>+</sup> cells from *Cx3cr1Cre; Rosa26<sup>Td</sup>* mice with and without Ang II infusion. n=5. All data are presented as mean  $\pm$  standard error mean. Data in (A), (B) and (D) were analyzed by two-tailed unpaired Student's t test. \*P<0.05, \*\*P<0.01.

**Supplementary Figure 3**

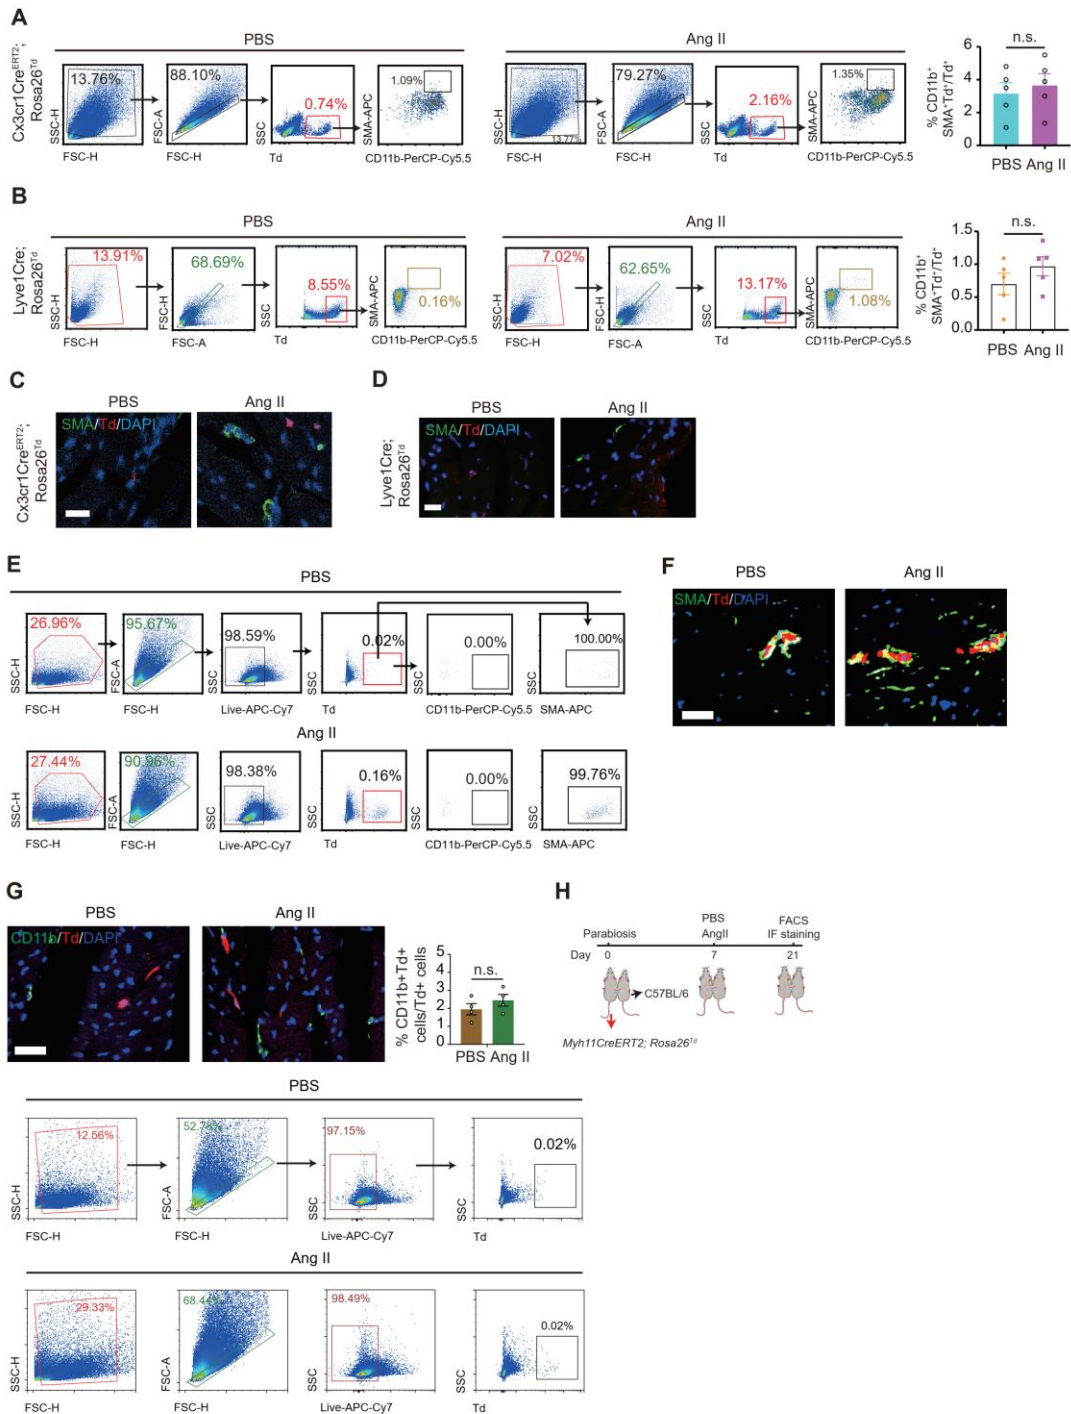

**Supplementary Figure 3. Cardiac resident macrophages do not transit into myofibroblasts under hypertension showed in the *Cx3cr1Cre<sup>ERT2</sup>* and *Lyve1Cre* lineage tracing mice. **A**, Representative flow cytometry analyses of cardiac CD11b<sup>+</sup>SMA<sup>+</sup> cells gated on Td<sup>+</sup> cells from PBS (left) and Ang II (middle) treated *Cx3cr1Cre<sup>ERT2</sup>; Rosa26<sup>Td</sup>* mice with quantification at right. n=5. **B**, Representative flow cytometry analyses of cardiac CD11b<sup>+</sup>SMA<sup>+</sup> cells gated on Td<sup>+</sup> cells from PBS (left) and Ang II (middle) treated *Lyve1Cre; Rosa26<sup>Td</sup>* mice with quantification at right. n=5. **C**, Representative immunofluorescent images of SMA<sup>+</sup>Td<sup>+</sup> cells of cardiac**

tissues from *Cx3cr1Cre<sup>ERT2</sup>; Rosa26<sup>Td</sup>* mice with and without Ang II infusion, with quantification at right. Scale bar, 100  $\mu$ m. **D**, Representative immunofluorescent images of SMA<sup>+</sup>Td<sup>+</sup> cells of cardiac tissues from *Lyve1Cre; Rosa26<sup>Td</sup>* mice with and without Ang II infusion, with quantification at right. Scale bar, 100  $\mu$ m. **E**, Representative images of flow cytometry analyses of CD11b<sup>+</sup> and SMA<sup>+</sup> cells gated on Td<sup>+</sup> cells in hearts *Myh11Cre<sup>ERT2</sup>; Rosa26<sup>Td</sup>* mice with control PBS or Ang II treatment. **F**, Representative immunofluorescent images of SMA in hearts from PBS and Ang II treated *Myh11Cre<sup>ERT2</sup>; Rosa26<sup>Td</sup>* mice (n=4), with quantification at right. Scale bar, 100  $\mu$ m. **G**, Representative immunofluorescent images of CD11b in hearts from PBS and Ang II treated *Myh11Cre<sup>ERT2</sup>; Rosa26<sup>Td</sup>* mice (n=4), with quantification at right. Scale bar, 100  $\mu$ m. **H**, Representative images of flow cytometry analyses of Td<sup>+</sup> cells gated on live cells in hearts from C57BL/6 mice conjoined with *Myh11Cre<sup>ERT2</sup>; Rosa26<sup>Td</sup>* mice with control PBS or Ang II. All data are presented as mean  $\pm$  standard error mean. Data in (A), (B) and (G) were analyzed by two-tailed unpaired Student's t test. n.s. indicates nonsignificant. \*P<0.05, \*\*P<0.01.

Supplementary Figure 4

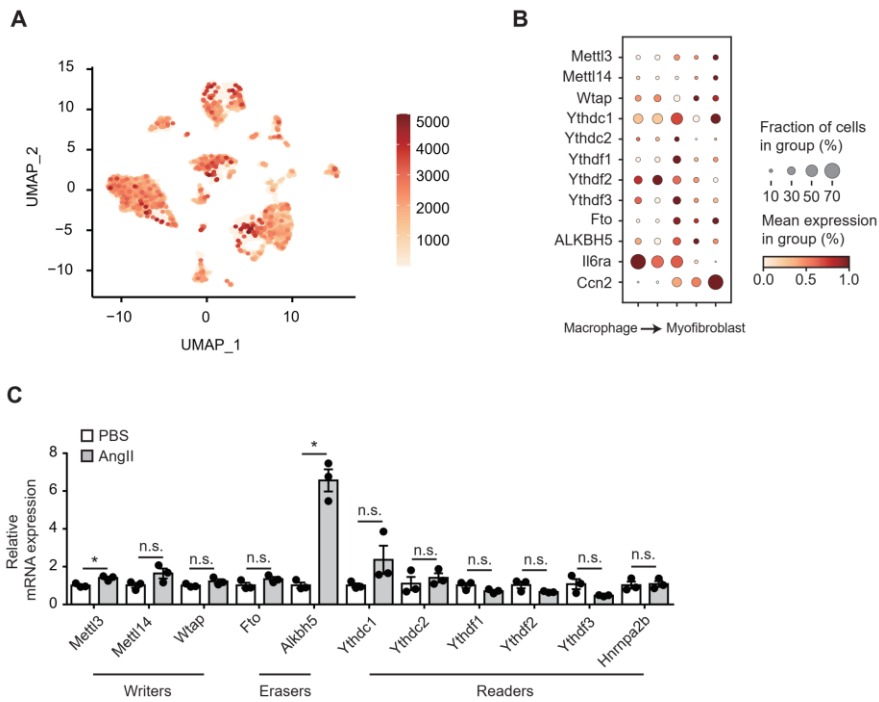

**Supplementary Figure 4. ALKBH5 upregulation is involved in hypertension-induced cardiac MMT.** **A**, Dot plots depicting single-cell gene expression of ALKBH5 in the total cardiac cell clusters visualized on the UMAP dimensionality reduction analysis. **B**, Dot plot of m6A genes for each cluster. **C**, qPCR analysis of mRNA expression levels of m6A genes in cardiac Td<sup>+</sup> cells from *Cx3cr1Cre; Rosa26<sup>Td</sup>* mice. Error bars indicate mean ± SEM. n=3. All data are presented as mean ± standard error mean. Data in (C) were analyzed by two-tailed unpaired Student's t test. n.s. indicates nonsignificant. \*P<0.05.

**Supplementary Figure 5**

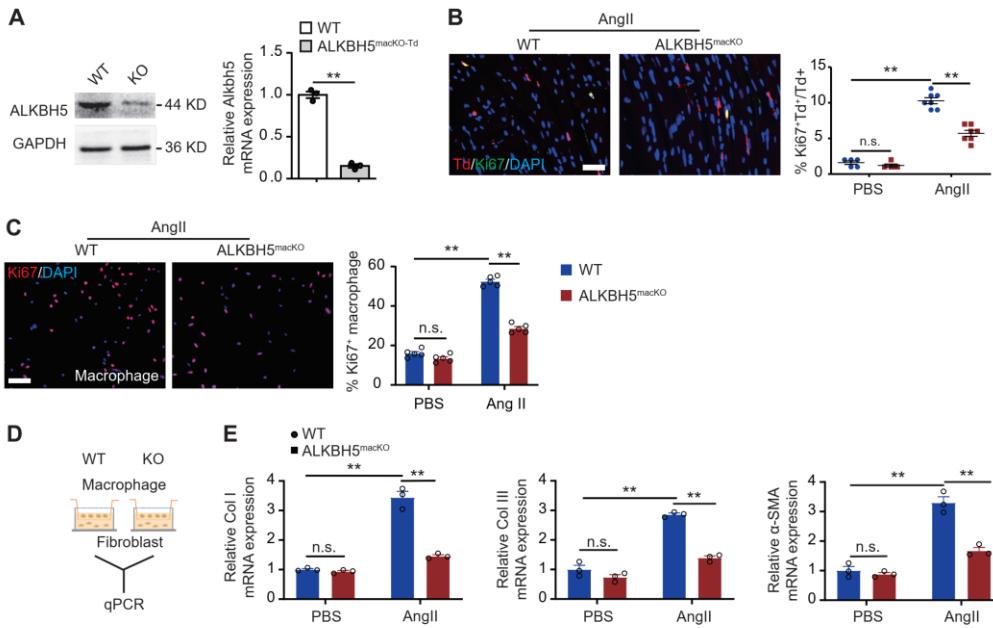

**Supplementary Figure 5. ALKBH5 deletion in macrophages inhibits MMT and myofibroblast proliferation with Ang II stimulation.** **A**, Expression of ALKBH5 in cardiac Td<sup>+</sup> cells from *WT* and *ALKBH5<sup>macKO</sup>* mice assessed by western blot (left) and qPCR (right). n=3. **B**, Representative immunofluorescent images and quantification of Ki67<sup>+</sup> cells in Td<sup>+</sup> cells of cardiac tissues from *WT* and *ALKBH5<sup>macKO</sup>* mice. n =5-7. Scale bar, 100 μm. **C**, Representative images and quantification of Ki67 positive cells in *WT* and *ALKBH5<sup>macKO</sup>* macrophages with and without Ang II treatment. n=5. Scale bar, 100 μm. **D**, Schematic diagram of an *in vitro* experiment to show that the effect of macrophage ALKBH5 deletion on the cultured fibroblasts. **E**, qPCR analysis of ECM genes collagen I and III and SMA in myofibroblasts treated with condition medium of macrophages. n=3. All data are presented as mean ± standard error mean. Data in (A) were analyzed by two-tailed unpaired Student's t test. n.s. indicates nonsignificant. Data in (B) were analyzed by two-way ANOVA followed by Tukey post-hoc tests. Data in (C) and (E) were analyzed by one-way ANOVA followed by Tukey post-hoc tests. n.s. indicates nonsignificant. \*\*P<0.01.



**Supplementary Figure 6**

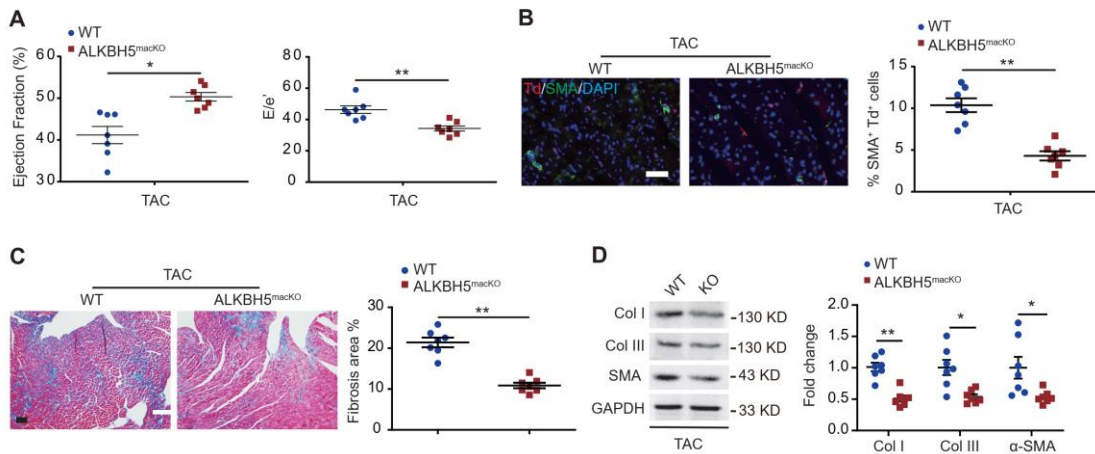

**Supplementary Figure 6. ALKBH5 deletion in Cx3cr1 derived lineage improves cardiac dysfunction under pressure overload-induced cardiac remodeling.** **A**, Quantification analysis of ejection fraction and E/e' in TAC induced *WT* and *ALKBH5<sup>macKO-Td</sup>* mice by echocardiography. n =7. **B**, Representative immunofluorescent images and quantification of SMA+ cells in cardiac Td+ cells from TAC induced *WT* and *ALKBH5<sup>macKO-Td</sup>* mice. n =7. Scale bar, 100 μm. \*\*P<0.01. **C**, Representative images and quantification of Masson trichrome staining in cardiac tissue from TAC induced mice. n =7. Scale bar, 100 μm. **D**, Representative images and quantification of the collagen (Col) types I and III and α-SMA expression by western blot. n=7. All data are presented as mean ± standard error mean. Data in (A), (B), (C) and (D) were analyzed by two-tailed unpaired Student's t test. n.s. indicates nonsignificant. \*P<0.05, \*\*P<0.01.



### Supplementary Figure 7

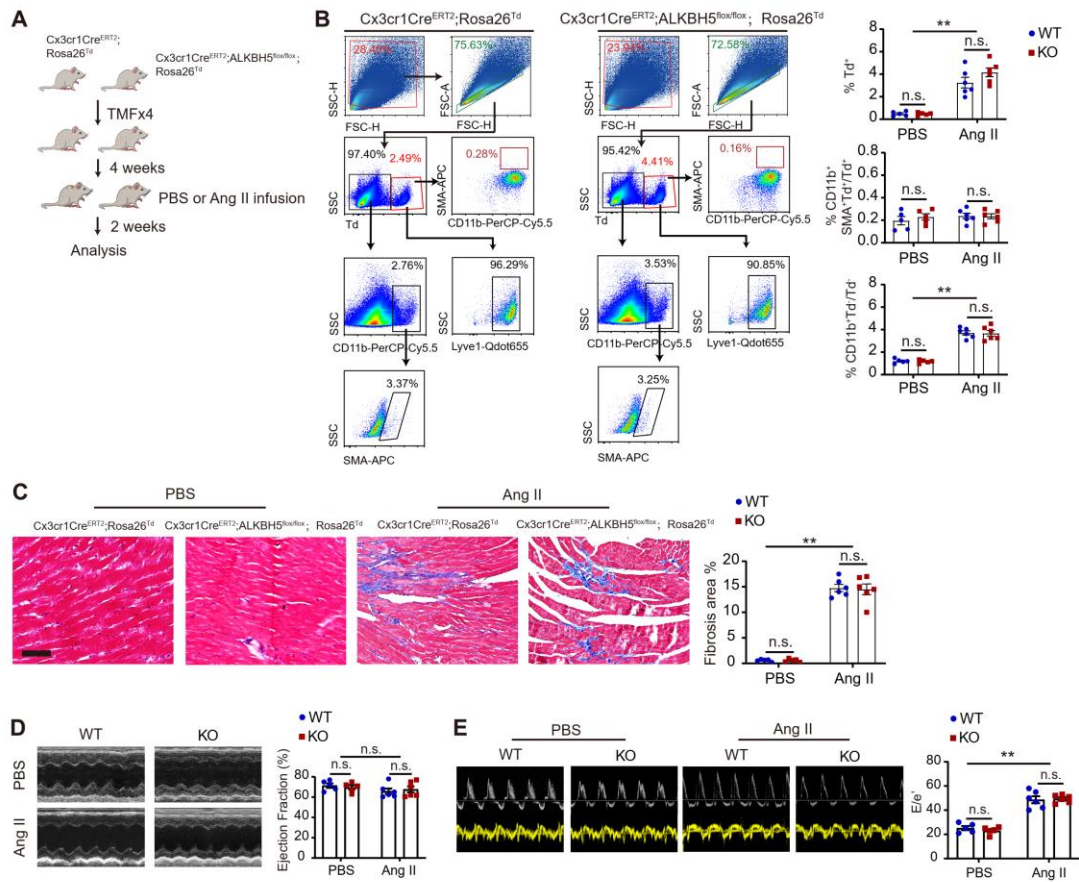

**Supplementary Figure 7. ALKBH5 deletion in cardiac resident macrophages has no effects on MMT and cardiac fibrosis and dysfunction.** **A**, Diagram of deletion ALKBH5 in cardiac resident macrophages. **B**, Representative flow cytometry analyses of cardiac CD11b<sup>+</sup>SMA<sup>+</sup> cells gated on Td<sup>+</sup> cells from PBS and Angiotensin II treated *Cx3cr1Cre<sup>ERT2</sup>;Rosa26<sup>Td</sup>* and *Cx3cr1Cre<sup>ERT2</sup>;ALKBH5<sup>floxflox</sup>;Rosa26<sup>Td</sup>* mice, with representative images at left and quantification at right. n=5. **C**, Representative images of Masson trichrome staining in cardiac tissue from PBS and Angiotensin II treated *Cx3cr1Cre<sup>ERT2</sup>;Rosa26<sup>Td</sup>* and *Cx3cr1Cre<sup>ERT2</sup>;ALKBH5<sup>floxflox</sup>;Rosa26<sup>Td</sup>* mice, with quantification of positive fibrotic area at right. Scale bar, 100  $\mu$ m. **D**, Representative echocardiography images and quantification of ejection fraction of above mice. **E**, Representative echocardiography images and quantification of E/e' of above mice. All data are presented as mean  $\pm$  standard error mean. Data in (B), (C), (D) and (E) were analyzed by two-way ANOVA followed by Tukey post-hoc tests. n.s. indicates nonsignificant. \*\*P<0.01.

**Supplementary Figure 8**

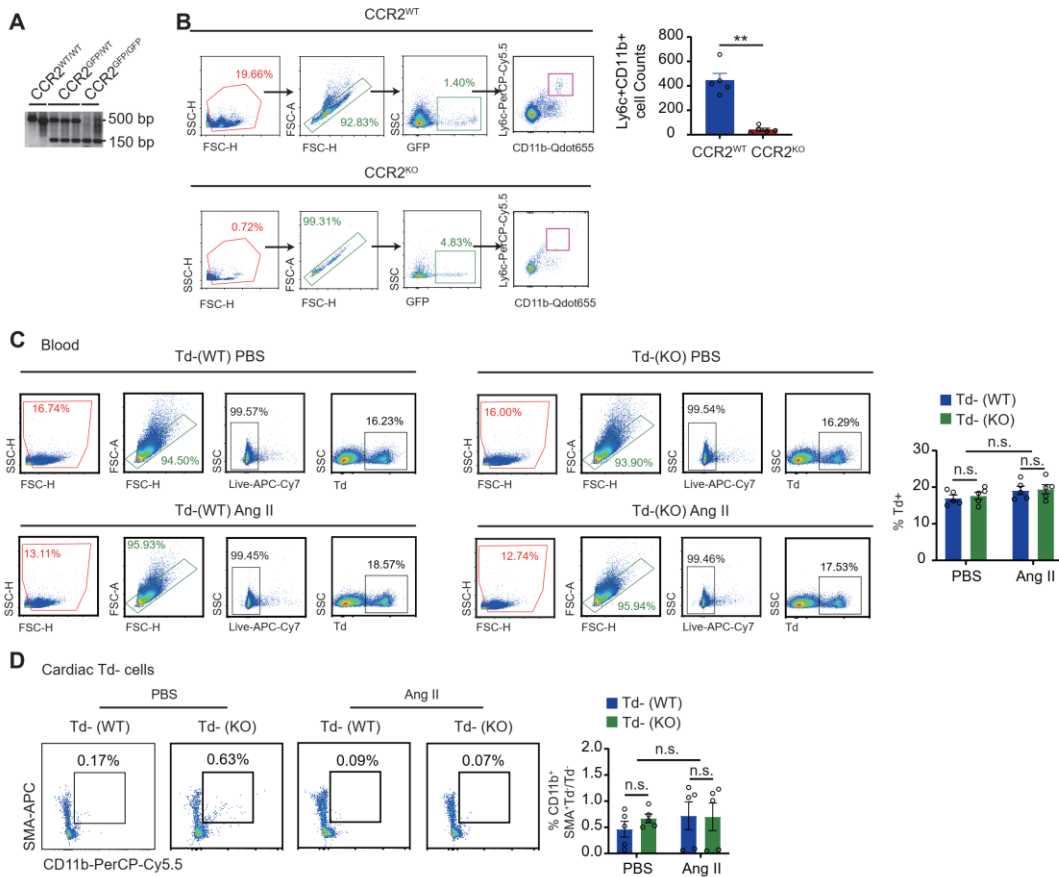

**Supplementary Figure 8. CCR2 was significantly decreased in *CCR2*<sup>KO</sup> mice. A,** Agarose gel electrophoresis showing results of PCR genotyping. **B,** Representative flow cytometry analyses of blood CD11b+Ly6c+ cells from *CCR2*<sup>WT</sup> and *CCR2*<sup>KO</sup> mice with quantification at right. n=5. **C,** Representative images and quantification of flow cytometry analyses of blood Td+ cells from *CCR2*<sup>KO</sup> mice cojoined with *Cx3cr1Cre; Rosa26*<sup>Td</sup> or *Cx3cr1Cre; ALKBH5*<sup>fl/fl</sup>; *Rosa26*<sup>Td</sup> mice. n =5. **D,** Representative images and quantification of flow cytometry analyses of CD11b+SMA+ cells gated on Td- cells in hearts from *CCR2*<sup>KO</sup> mice cojoined with *Cx3cr1Cre; Rosa26*<sup>Td</sup> or *Cx3cr1Cre; ALKBH5*<sup>fl/fl</sup>; *Rosa26*<sup>Td</sup> mice. n =5. All data are presented as mean ± standard error mean. Data in (B) were analyzed by two-tailed unpaired Student's t test. Data in (C) and (D) were analyzed by two-way ANOVA followed by Tukey post-hoc tests. n.s. indicates nonsignificant. \*\*P<0.01.

**Supplementary Figure 9**

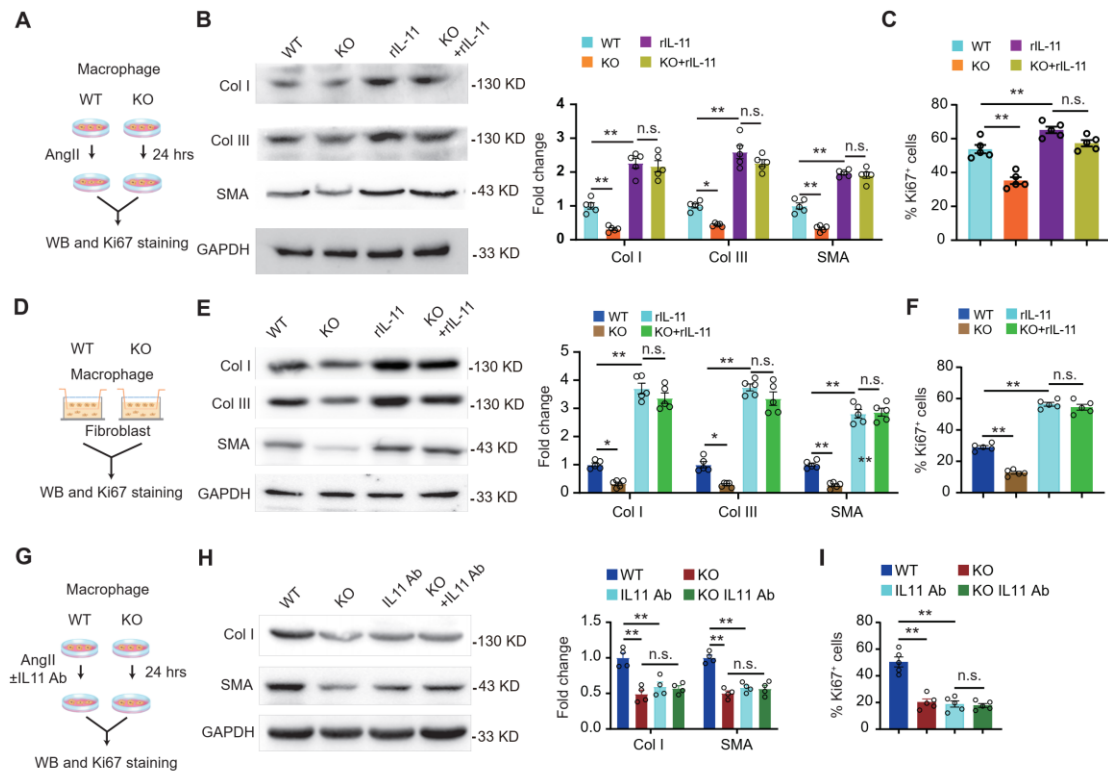

**Supplementary Figure 9. Exogenous IL-11 reverses macrophage ALKBH5 deletion-mediated decrease in MMT, proliferation and ECM gene expression in myofibroblasts.** **A**, Schematic diagram of *in vitro* experiment to show that exogenous IL-11 reversed ALKBH5 deletion-mediated decrease of MMT and macrophage proliferation with Ang II treatment. **B**, Expression of SMA and ECM genes collagen I and III in macrophages with Ang II treatment evaluated by western blot with representative images at left and quantification at right. n=5. **C**, Quantification of Ki67 positive cells in macrophages with Ang II treatment. n=5. **D**, Schematic diagram of an *in vitro* experiment to show effect of exogenous IL-11 on SMA and ECM gene expression in fibroblasts and fibroblast proliferation. **E**, Expression of SMA and ECM genes collagen I and III in fibroblasts treated with condition medium of macrophage shown by western blot with representative images at left and quantification at right (n=5). **F**, Quantification of Ki67 positive cells in fibroblasts treated with Ang II (n=5). **G**, Schematic diagram of an *in vitro* experiment to show effect of IL11 neutralizing antibody on SMA and ECM gene expression and proliferation in Ang II treated macrophages. **H** Expression of SMA and ECM gene collagen I in macrophages with Ang II treatment evaluated by western blot with representative images at left and quantification at right. n=5. **I**, Quantification of Ki67 positive cells in macrophages with Ang II treatment. n=5. All data are presented as mean  $\pm$  standard error mean. Data in (B), (C), (E), (F), (H) and (I) were analyzed by one-way ANOVA followed by Tukey post-hoc tests. n.s. indicates nonsignificant. \*P<0.05, \*\*P<0.01.

### Supplementary Figure 10

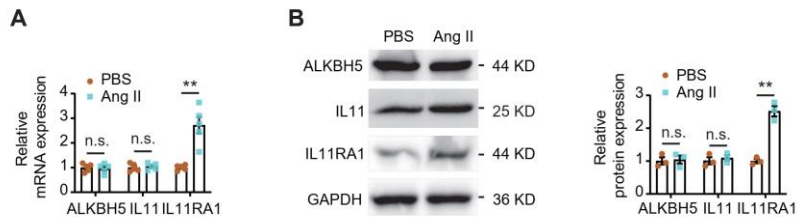

**Supplementary Figure 10. ALKBH5 in fibroblasts is not changed following Ang II treatment.** **A**, mRNA levels of ALKBH5, IL11 and IL11RA1 expression in cultured fibroblasts with and without Ang II treatment. Error bars indicate mean  $\pm$  SEM. n =5. n.s. indicates nonsignificant. \*\*P<0.01. **B**, Expression of ALKBH5, IL11 and IL11RA1 by western blot in cultured fibroblasts with and without Ang II infusion, with quantification at right. Error bars indicate mean  $\pm$  SEM. n =5. \*\*P<0.01.

**Supplementary Figure 11**

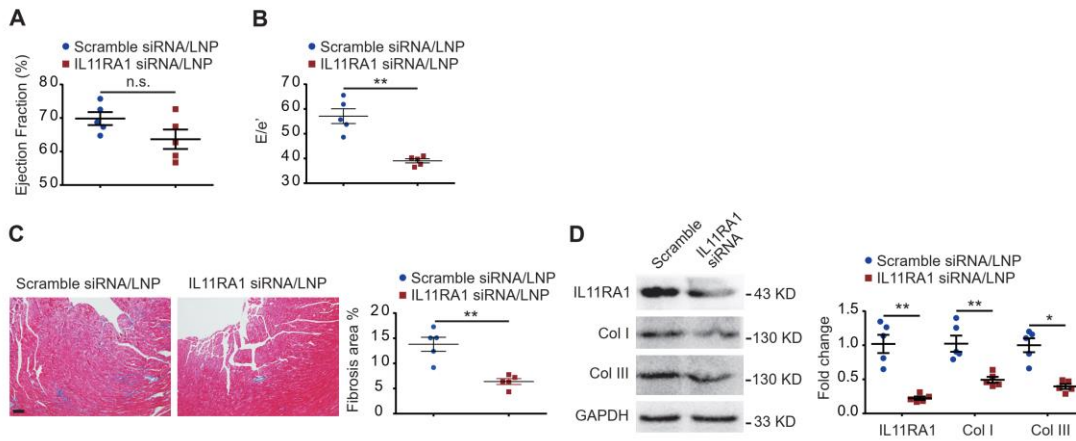

**Supplementary Figure 11. Lipid nanoparticle monocyte/macrophage-target delivery of IL11RA1 siRNA attenuates Ang II-induced cardiac fibrosis and dysfunction.** **A**, Indices of ejection fraction with scramble or IL11RA1 siRNA/LNP (n=5). Error bars indicate mean  $\pm$  SEM. **B**, Indices of E/e' with scramble or IL11RA1 siRNA/LNP (n=5). Error bars indicate mean  $\pm$  SEM. **C**, Representative images and quantification of positive fibrotic area of Masson trichrome staining in cardiac tissue of mice with scramble or IL11RA1 siRNA/LNP (n=5). Scale bar, 100  $\mu$ m. **D**, Western blot analysis of IL11RA1, ECM genes collagen I and III in cardiac tissues from mice with scramble or IL11RA1 siRNA/LNP. Quantitative results are shown on the right (n=5). All data are presented as mean  $\pm$  standard error mean. Data in (A), (B), (C) and (D) were analyzed by two-tailed unpaired Student's t test. n.s. indicates nonsignificant. \*P<0.05, \*\*P<0.01.

Supplementary Figure 12

A

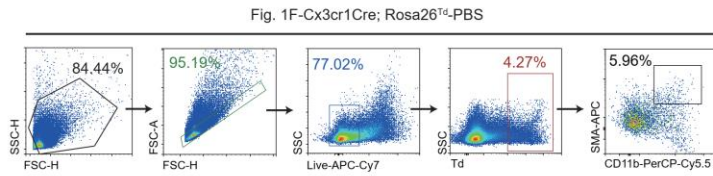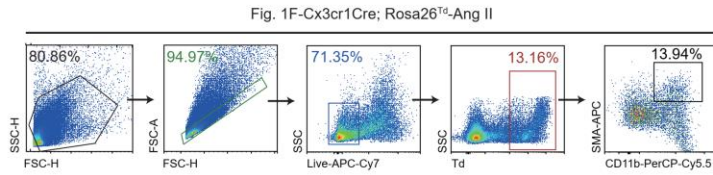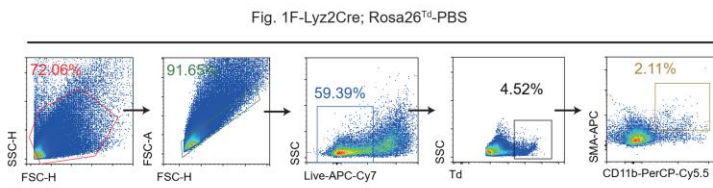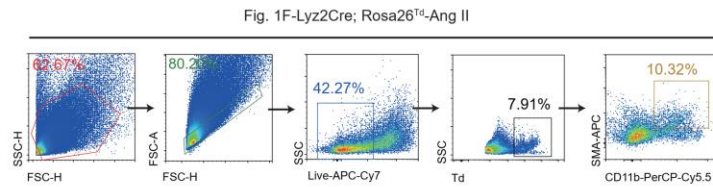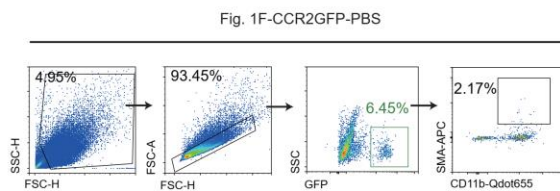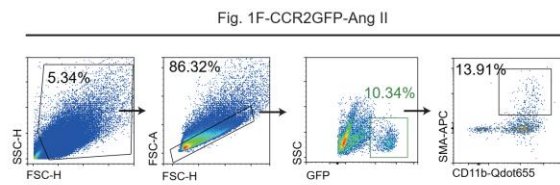

B

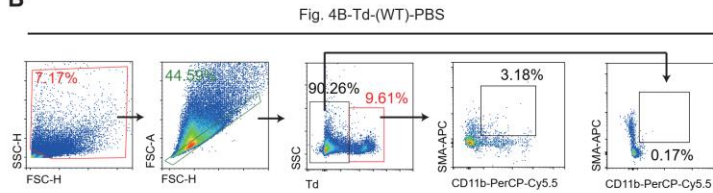



Continue

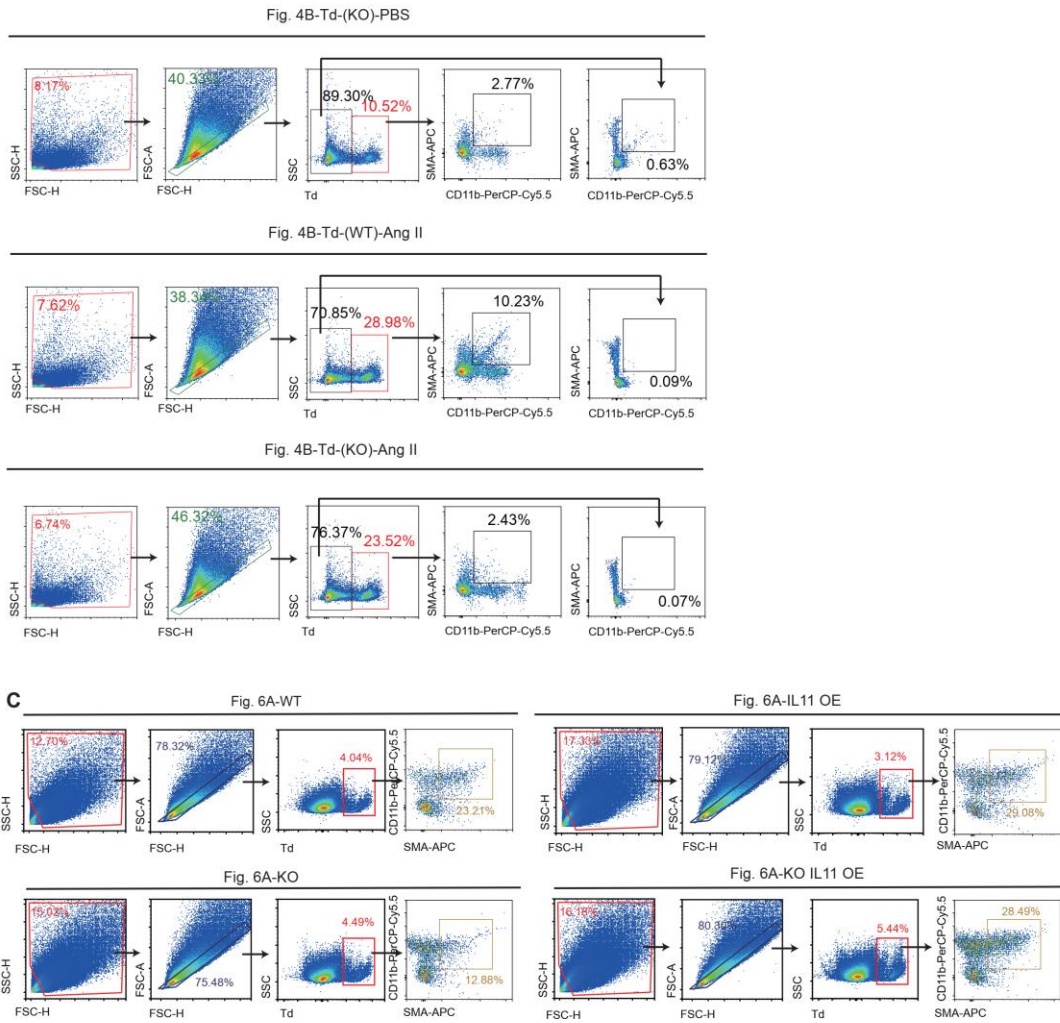

**Supplementary Figure 12. Gating strategies used for flow cytometry analysis. A,** Representative images of gating information for flow cytometry analysis in Figure 1F. **B,** Representative images of gating information for flow cytometry analysis in Figure 4B. **C,** Representative images of gating information for flow cytometry analysis in Figure 6A.



Supplementary Table 1: oligonucleotide sequences

| Primer sequences for reverse transcript quantitative PCR (RT-qPCR)       |                         |
|--------------------------------------------------------------------------|-------------------------|
| Gene Name                                                                | Sequence                |
| Gapdh-F                                                                  | CTA AAGGGCATCCTGGGC     |
| Gapdh-R                                                                  | TTACTCCTTGGAGGCCAT      |
| Col I-F                                                                  | CGTATCACCAAACCTCAGAAG   |
| Col I-R                                                                  | TCATCATAGCCATAGGACATC   |
| $\alpha$ -SMA-F                                                          | CTGAAGTATCCGATAGAACAC   |
| $\alpha$ -SMA-R                                                          | AGCCTGAATAGCCACATAC     |
| Alkbh5-F                                                                 | CTTCAGATCGCCTGTCAG      |
| Alkbh5-R                                                                 | GCAATCTTCCGAGGACTC      |
| Il-11-F                                                                  | CTTCGAGTAGACTTGATGTCCTA |
| Il-11-R                                                                  | GGGATCACAGGTTGGTCTG     |
| Col III-F                                                                | ATGACTGTCCCACGTAAGC     |
| Col III-R                                                                | TAGGCAATACTGTTTTTGCA    |
| Mettl14-F                                                                | CCTATGATACATCTGCTCCAA   |
| Mettl14-R                                                                | GTCTGTGTCCAGTGTCTAC     |
| Mettl3-F                                                                 | TAACTTACGCTGACCACTC     |
| Mettl3-R                                                                 | GTGCTTCCTTGACTTCTTAG    |
| Wtap-F                                                                   | AGTACCTCAAGCAAGTTCA     |
| Wtap-R                                                                   | TCTCCTGGATAAGCATTTCG    |
| Fto-F                                                                    | CGAGACACCAGGATTAACA     |
| Fto-R                                                                    | CAACTGACAGCGTTCTAAG     |
| Ythdc1-F                                                                 | GAACCTTACAAGAGTCAACCA   |
| Ythdc1-R                                                                 | TCCTCCTCATTCTCAGTGTT    |
| Ythdc2-F                                                                 | TACTCAACCAAGACGACTAG    |
| Ythdc2-R                                                                 | GCACTTCATCCACAATAACA    |
| Ythdf1-F                                                                 | TCTCCTCTTCAGTGTCAATG    |
| Ythdf1-R                                                                 | GTTGTCGTTATTCTCCAGTC    |
| Ythdf2-F                                                                 | AATGGAGTAGGACAGTCTCA    |
| Ythdf2-R                                                                 | TCTCTTGTTACCATGCTCTG    |
| Ythdf3-F                                                                 | AGTTACGGCTATCCACCTA     |
| Ythdf3-R                                                                 | CATACCACTGCTGCTCAA      |
| Hnrnpa2b-F                                                               | GGAGTGGAAAGAGGAGGAA     |
| Hnrnpa2b-R                                                               | AGTTAGAAGGCTGCTGGT      |
| Primer sequences for Methylated RNA immunoprecipitation quantitative PCR |                         |
| Name                                                                     | Sequence                |
| Peak1-F                                                                  | GATCGGGTTAGGAGAACAG     |
| Peak1-R                                                                  | CTCAGAGGCAGAAGAATCTA    |
| Peak2-F                                                                  | AGGTAGTCACTGCGAGAG      |
| Peak2-R                                                                  | CCTGTTGAACACGGTATGT     |
| siRNA                                                                    |                         |
| Gene Name                                                                | Sequence                |
| ALKBH5                                                                   | GCCTCAGGACATTAAGGAA     |
| IL11RA1                                                                  | CTTGGAGGAAGTGATAACA     |
