# Supplementary material for: ALKBH5-mediated m6A modification of IL-11 drives macrophage-to-myofibroblast transition and pathological cardiac fibrosis in mice
Source: PubMed Central journal article supplement (PMC10914760; doi:10.1038/s41467-024-46357-x), 2024-03-05
Supplement: 41467_2024_46357_MOESM3_ESM.pdf [file 41467_2024_46357_MOESM3_ESM.pdf]

## **Description of Additional Supplementary Files**

Supplementary Data 1: ALKBH5 target mRNA shown by RNA immunoprecipitation-sequencing
